# Supplementary material for: Bleeding profile of women using a drospirenone-only pill 4 mg over nine cycles in comparison with desogestrel 0.075 mg
Source: PubMed Central journal article supplement (PMC7323950; doi:10.1371/journal.pone.0231856), 2020-06-29

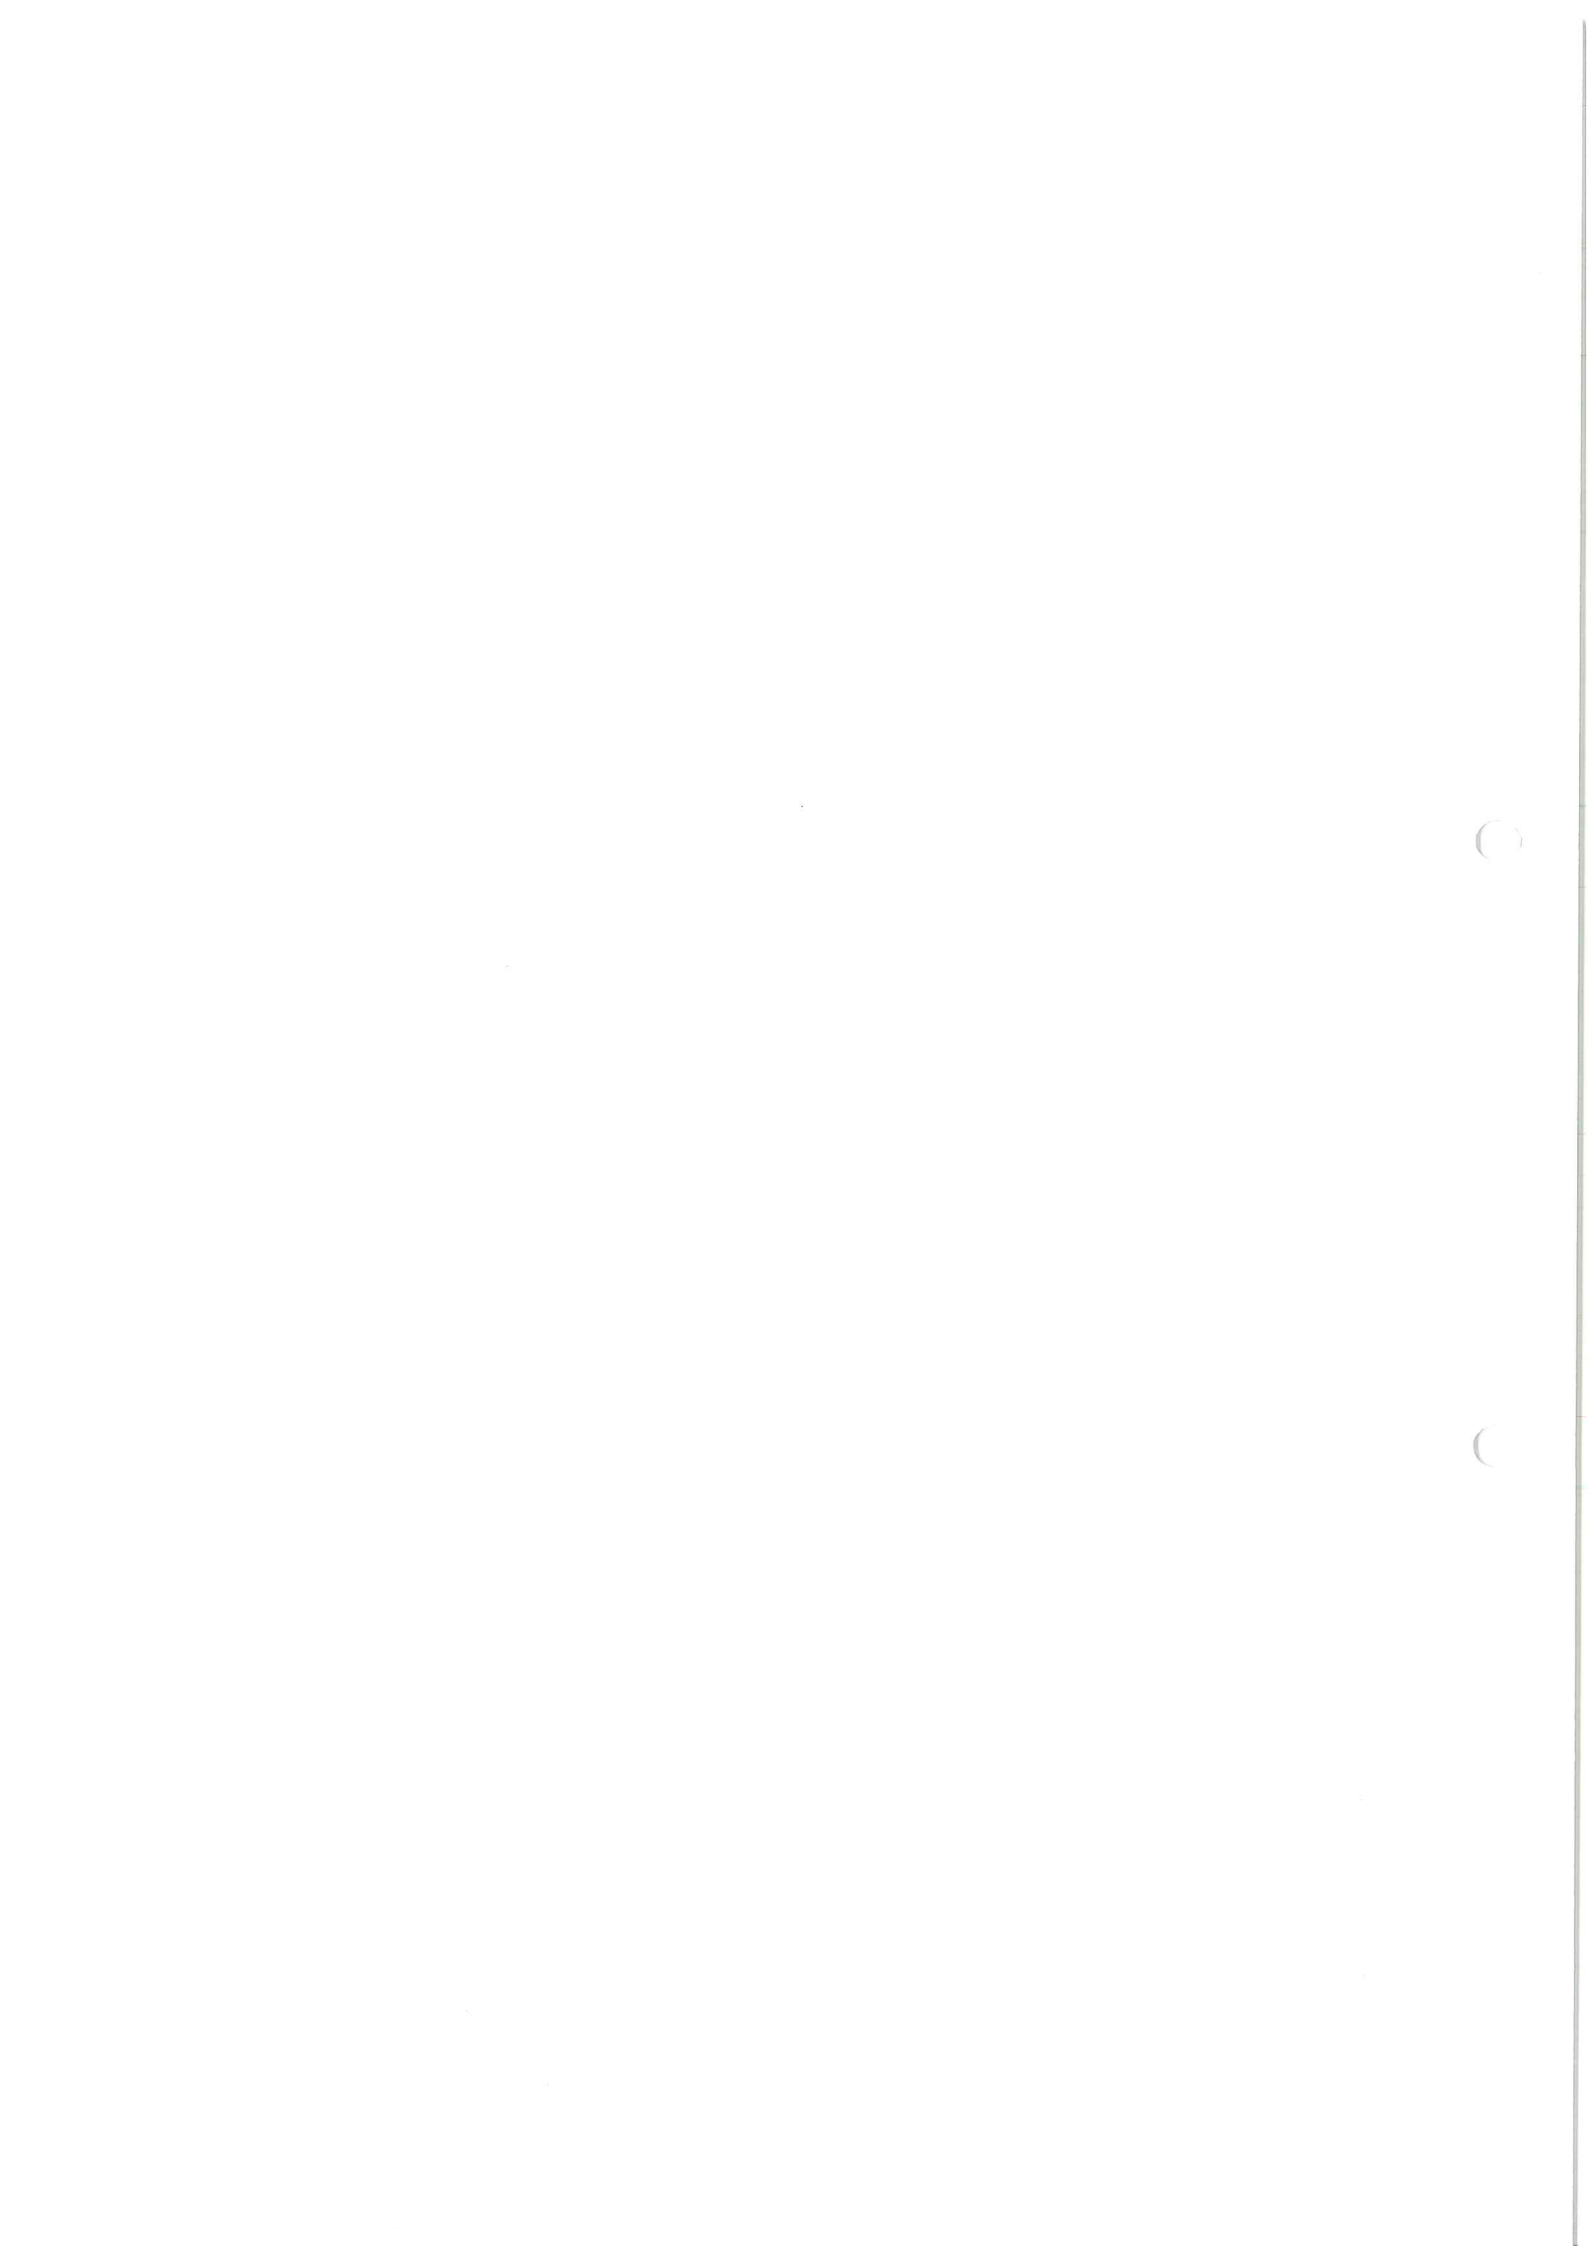

| Site No.                  | City                | Investigator                      | Participation | Central/Leading EC                                    | Local EC                                              | Authorities                                           | Agreement | SIV        | First patient in | Planned No of Pat | Site closed | Comments |
|---------------------------|---------------------|-----------------------------------|---------------|-------------------------------------------------------|-------------------------------------------------------|-------------------------------------------------------|-----------|------------|------------------|-------------------|-------------|----------|
| <b>Poland (551-589)</b>   |                     |                                   |               |                                                       |                                                       |                                                       |           |            |                  |                   |             |          |
| 551                       | Krakow              | Flaska                            | X             |                                                       |                                                       |                                                       | yes       | 31.08.2012 | 13.09.2012       | 18                | 17.06.2014  |          |
| 552                       | Katowice            | Wigilowska-Sawicki                | (X)           |                                                       |                                                       |                                                       | yes       | 24.08.2012 | N/A              | 17                | 05.02.2013  |          |
| 553                       | Warsaw              | Wigilowska-Sawicki                | X             |                                                       |                                                       |                                                       | yes       | 20.07.2012 | 06.08.2012       | 17                | 23.05.2014  |          |
| 554                       | Warsaw              | Bojar                             | (X)           |                                                       |                                                       |                                                       | yes       | 21.08.2012 | N/A              | 17                | 04.03.2013  |          |
| 555                       | Katowice            | Chemical                          | X             |                                                       |                                                       |                                                       | yes       | 02.08.2012 | 27.11.2012       | 18                | 12.06.2014  |          |
| 556                       | Warsaw              | Jakimuk                           | X             | 30.01.2012; 29.05.2012 (site 561, PI change site 559) | 08.02.2012, 04.06.2012 (site 561, PI change site 559) | 23.01.2011, 25.05.2012 (site 561, PI change site 559) | yes       | 26.07.2012 | 20.08.2012       | 17                | 07.06.2014  |          |
| 557                       | Lozdz               | Pawinski                          | X             |                                                       |                                                       |                                                       | yes       | 04.09.2012 | 09.01.2013       | 17                | 07.05.2014  |          |
| 558                       | Lozdz               | Jedrzejewski                      | X             |                                                       |                                                       |                                                       | yes       | 07.06.2012 | 08.08.2012       | 16                | 20.05.2014  |          |
| 559                       | Lozdz               | Polijacki (formerly Plebs-Kolpak) | X             |                                                       |                                                       |                                                       | yes       | 25.07.2012 | 16.08.2012       | 17                | 11.06.2014  |          |
| 560                       | Kielce              | Adamski-Gruszka                   | X             |                                                       |                                                       |                                                       | yes       | 01.03.2012 | 08.08.2012       | 30                | 06.05.2014  |          |
| 561                       | Lozdz               | Malinowski                        | (X)           |                                                       |                                                       |                                                       | yes       | 25.10.2012 | N/A              | 17                | 14.03.2013  |          |
| 562                       | Krakow              | Strzyzulek-Pitina                 | X             |                                                       |                                                       |                                                       | yes       | 26.07.2012 | 25.09.2012       | 30                | 04.06.2014  |          |
| 563                       | Mikolaj             | Nawara-Brunt                      | X             |                                                       |                                                       |                                                       | yes       | 29.03.2012 | 01.08.2012       | 17                | 28.05.2014  |          |
| 564                       | Warsaw              | Brankowska                        | (X)           |                                                       |                                                       |                                                       | yes       | 27.11.2012 | N/A              | 20                | 05.03.2013  |          |
| 565                       | Lozdz               | Jedrzejewski                      | X             |                                                       |                                                       |                                                       | yes       | 29.11.2012 | 05.12.2012       | 13                | 21.05.2014  |          |
| 566                       | Lozdz               | Krawcow                           | X             |                                                       |                                                       |                                                       | yes       | 14.11.2012 | 23.11.2012       | 13                | 08.05.2014  |          |
| 567                       | Kielce              | Flaska                            | X             |                                                       |                                                       |                                                       | yes       | 14.11.2012 | 23.11.2012       | 13                | 08.05.2014  |          |
| 568                       | Bialystok           | Tomaszewski                       | X             |                                                       |                                                       |                                                       | yes       | 15.11.2012 | 16.11.2012       | 23                | 20.05.2014  |          |
| <b>Romania (651-662)</b>  |                     |                                   |               |                                                       |                                                       |                                                       |           |            |                  |                   |             |          |
| 651                       | Bucharest           | Manescu                           | X             | N/A                                                   |                                                       |                                                       | yes       | N/A        | N/A              | 28                | N/A         |          |
| 652                       | Bucharest           | Cornea                            | X             | 03.10.2012                                            |                                                       |                                                       | yes       | N/A        | N/A              | N/A               | N/A         |          |
| 653                       | Bucharest           | Dumitrascu                        | X             |                                                       |                                                       |                                                       | yes       | 23.11.2012 | 13.12.2012       | 30                | 03.06.2014  |          |
| 654                       | Clujna              | Gheorman                          | X             | N/A                                                   |                                                       |                                                       | yes       | N/A        | N/A              | 30                | N/A         |          |
| 655                       | Bucharest           | Tudoran                           | X             | 25.01.2012                                            |                                                       | 18.01.2012                                            | yes       | 13.11.2012 | 14.12.2012       | 30                | 26.05.2014  |          |
| 656                       | Oradea              | Stancu                            | X             | not given                                             |                                                       |                                                       | yes       | N/A        | N/A              | N/A               | N/A         |          |
| 657                       | Bucharest           | Costa                             | X             | 03.10.2012                                            |                                                       |                                                       | yes       | 15.11.2012 | 26.11.2012       | 30                | 30.05.2014  |          |
| 658                       | Bucharest           | Razari                            | X             |                                                       |                                                       |                                                       | yes       | 14.11.2012 | 27.11.2012       | 30                | 22.05.2014  |          |
| 659                       | Constanta           | Costea                            | X             |                                                       |                                                       |                                                       | yes       | not given  | N/A              | N/A               | N/A         |          |
| 660                       | Pogorari-Leordani   | Gheorghiu                         | back-up       | N/A                                                   |                                                       |                                                       | yes       | back-up    | N/A              | N/A               | N/A         |          |
| 661                       | Bucharest           | Moranu                            | back-up       | 25.01.2012                                            |                                                       | 18.01.2012                                            | yes       | back-up    | N/A              | N/A               | N/A         |          |
| 662                       | Bucharest           | Edu                               | back-up       | N/A                                                   |                                                       |                                                       | yes       | back-up    | N/A              | N/A               | N/A         |          |
| <b>Spain (751-762)</b>    |                     |                                   |               |                                                       |                                                       |                                                       |           |            |                  |                   |             |          |
| 751                       | Madrid              | Palleiros                         | X             |                                                       | N/A (Reference EC)                                    |                                                       | yes       | 23.07.2012 | 26.09.2012       | 23                | 09.06.2014  |          |
| 752                       | Granada             | Sanchez-Bonoso                    | X             |                                                       | 01.02.2012                                            |                                                       | yes       | 23.07.2012 | 26.09.2012       | 23                | 09.06.2014  |          |
| 753                       | Granada             | Jimenez                           | X             |                                                       | N/A                                                   |                                                       | yes       | 23.07.2012 | 26.09.2012       | 23                | 09.06.2014  |          |
| 754                       | Palma de Mallorca   | Jimenez                           | X             |                                                       | 01.02.2012                                            |                                                       | yes       | N/A        | N/A              | 20                | 12.06.2014  |          |
| 755                       | Madrid              | Gonzalez                          | X             |                                                       | N/A (Reference EC)                                    |                                                       | yes       | 22.08.2012 | 30.10.2012       | 18                | 10.06.2014  |          |
| 756                       | Guadalajara         | De La Jula                        | (X)           | 12.04.2012                                            |                                                       | 21.02.2012                                            | yes       | 15.11.2012 | N/A              | 20                | 11.02.2013  |          |
| 757                       | Girona              | Avarez                            | (X)           |                                                       |                                                       |                                                       | yes       | 15.10.2012 | N/A              | 20                | 20.02.2013  |          |
| 758                       | Barcelona           | Genio                             | (X)           |                                                       |                                                       |                                                       | yes       | 02.08.2012 | N/A              | 25                | 31.01.2013  |          |
| 759                       | Vic                 | Gru                               | X             |                                                       |                                                       |                                                       | yes       | 21.02.2012 | 09.10.2012       | 25                | 29.05.2014  |          |
| 760                       | Ordesa              | Presamodona                       | X             |                                                       |                                                       |                                                       | yes       | 01.02.2012 | 09.10.2012       | 25                | 29.05.2014  |          |
| 761                       | Sierra de Guadalupe | Sanjaume                          | X             |                                                       |                                                       |                                                       | yes       | 24.07.2012 | 27.11.2012       | 20                | 14.05.2014  |          |
| 762                       | Monestir            | Berros                            | X             |                                                       |                                                       |                                                       | yes       | 17.09.2012 | 28.12.2012       | 20                | 19.06.2014  |          |
| <b>Slovakia (851-860)</b> |                     |                                   |               |                                                       |                                                       |                                                       |           |            |                  |                   |             |          |
| 851                       | Marin               | Danko                             | X             |                                                       | N/A (MEC)                                             |                                                       | yes       | 06.08.2012 | 16.10.2012       | 20                | 23.05.2014  |          |
| 852                       | Bratislava          | Cujanki                           | X             |                                                       | 24.02.2012                                            |                                                       | yes       | 07.08.2012 | 10.10.2012       | 23                | 14.05.2014  |          |
| 853                       | Bratislava          | Belik                             | (X)           |                                                       | 12.03.2012                                            |                                                       | yes       | 15.08.2012 | N/A              | 17                | 21.02.2013  |          |
| 854                       | Bratislava          | Prizulova                         | X             |                                                       | see 852                                               |                                                       | yes       | 07.08.2012 | 24.09.2012       | 17                | 14.05.2014  |          |
| 855                       | Ruzicka Sobotka     | Bachanova                         | X             | 11.04.2012                                            |                                                       | 25.01.2012                                            | yes       | 07.08.2012 | 08.10.2012       | 17                | 14.05.2014  |          |
| 856                       | Blinagar            | Blinagar                          | X             |                                                       | see 853                                               |                                                       | N/A       | N/A        | N/A              | N/A               | N/A         |          |
| 857                       | Marin               | Fathova                           | X             |                                                       | N/A (MEC)                                             |                                                       | yes       | 06.08.2012 | 16.10.2012       | 20                | 23.05.2014  |          |
| 858                       | Poprad              | Fathova                           | X             |                                                       | 27.01.2012                                            |                                                       | yes       | 10.08.2012 | 22.08.2012       | 15                | 20.06.2014  |          |
| 859                       | Marin               | Gatova                            | X             | 09.10.2012                                            |                                                       | 09.10.2012                                            | yes       | 15.11.2012 | 09.01.2013       | 10                | 24.06.2014  |          |
| 860                       | Bratislava          | Sutkova                           | X             | 07.12.2012                                            |                                                       | 12.11.2012                                            | yes       | 15.11.2012 | 14.01.2013       | 8                 | 11.06.2014  |          |

National Coordinator (only AT, DE, PL, ES)  
 X (F) Freszer -20°C (only appl. DE, AT)

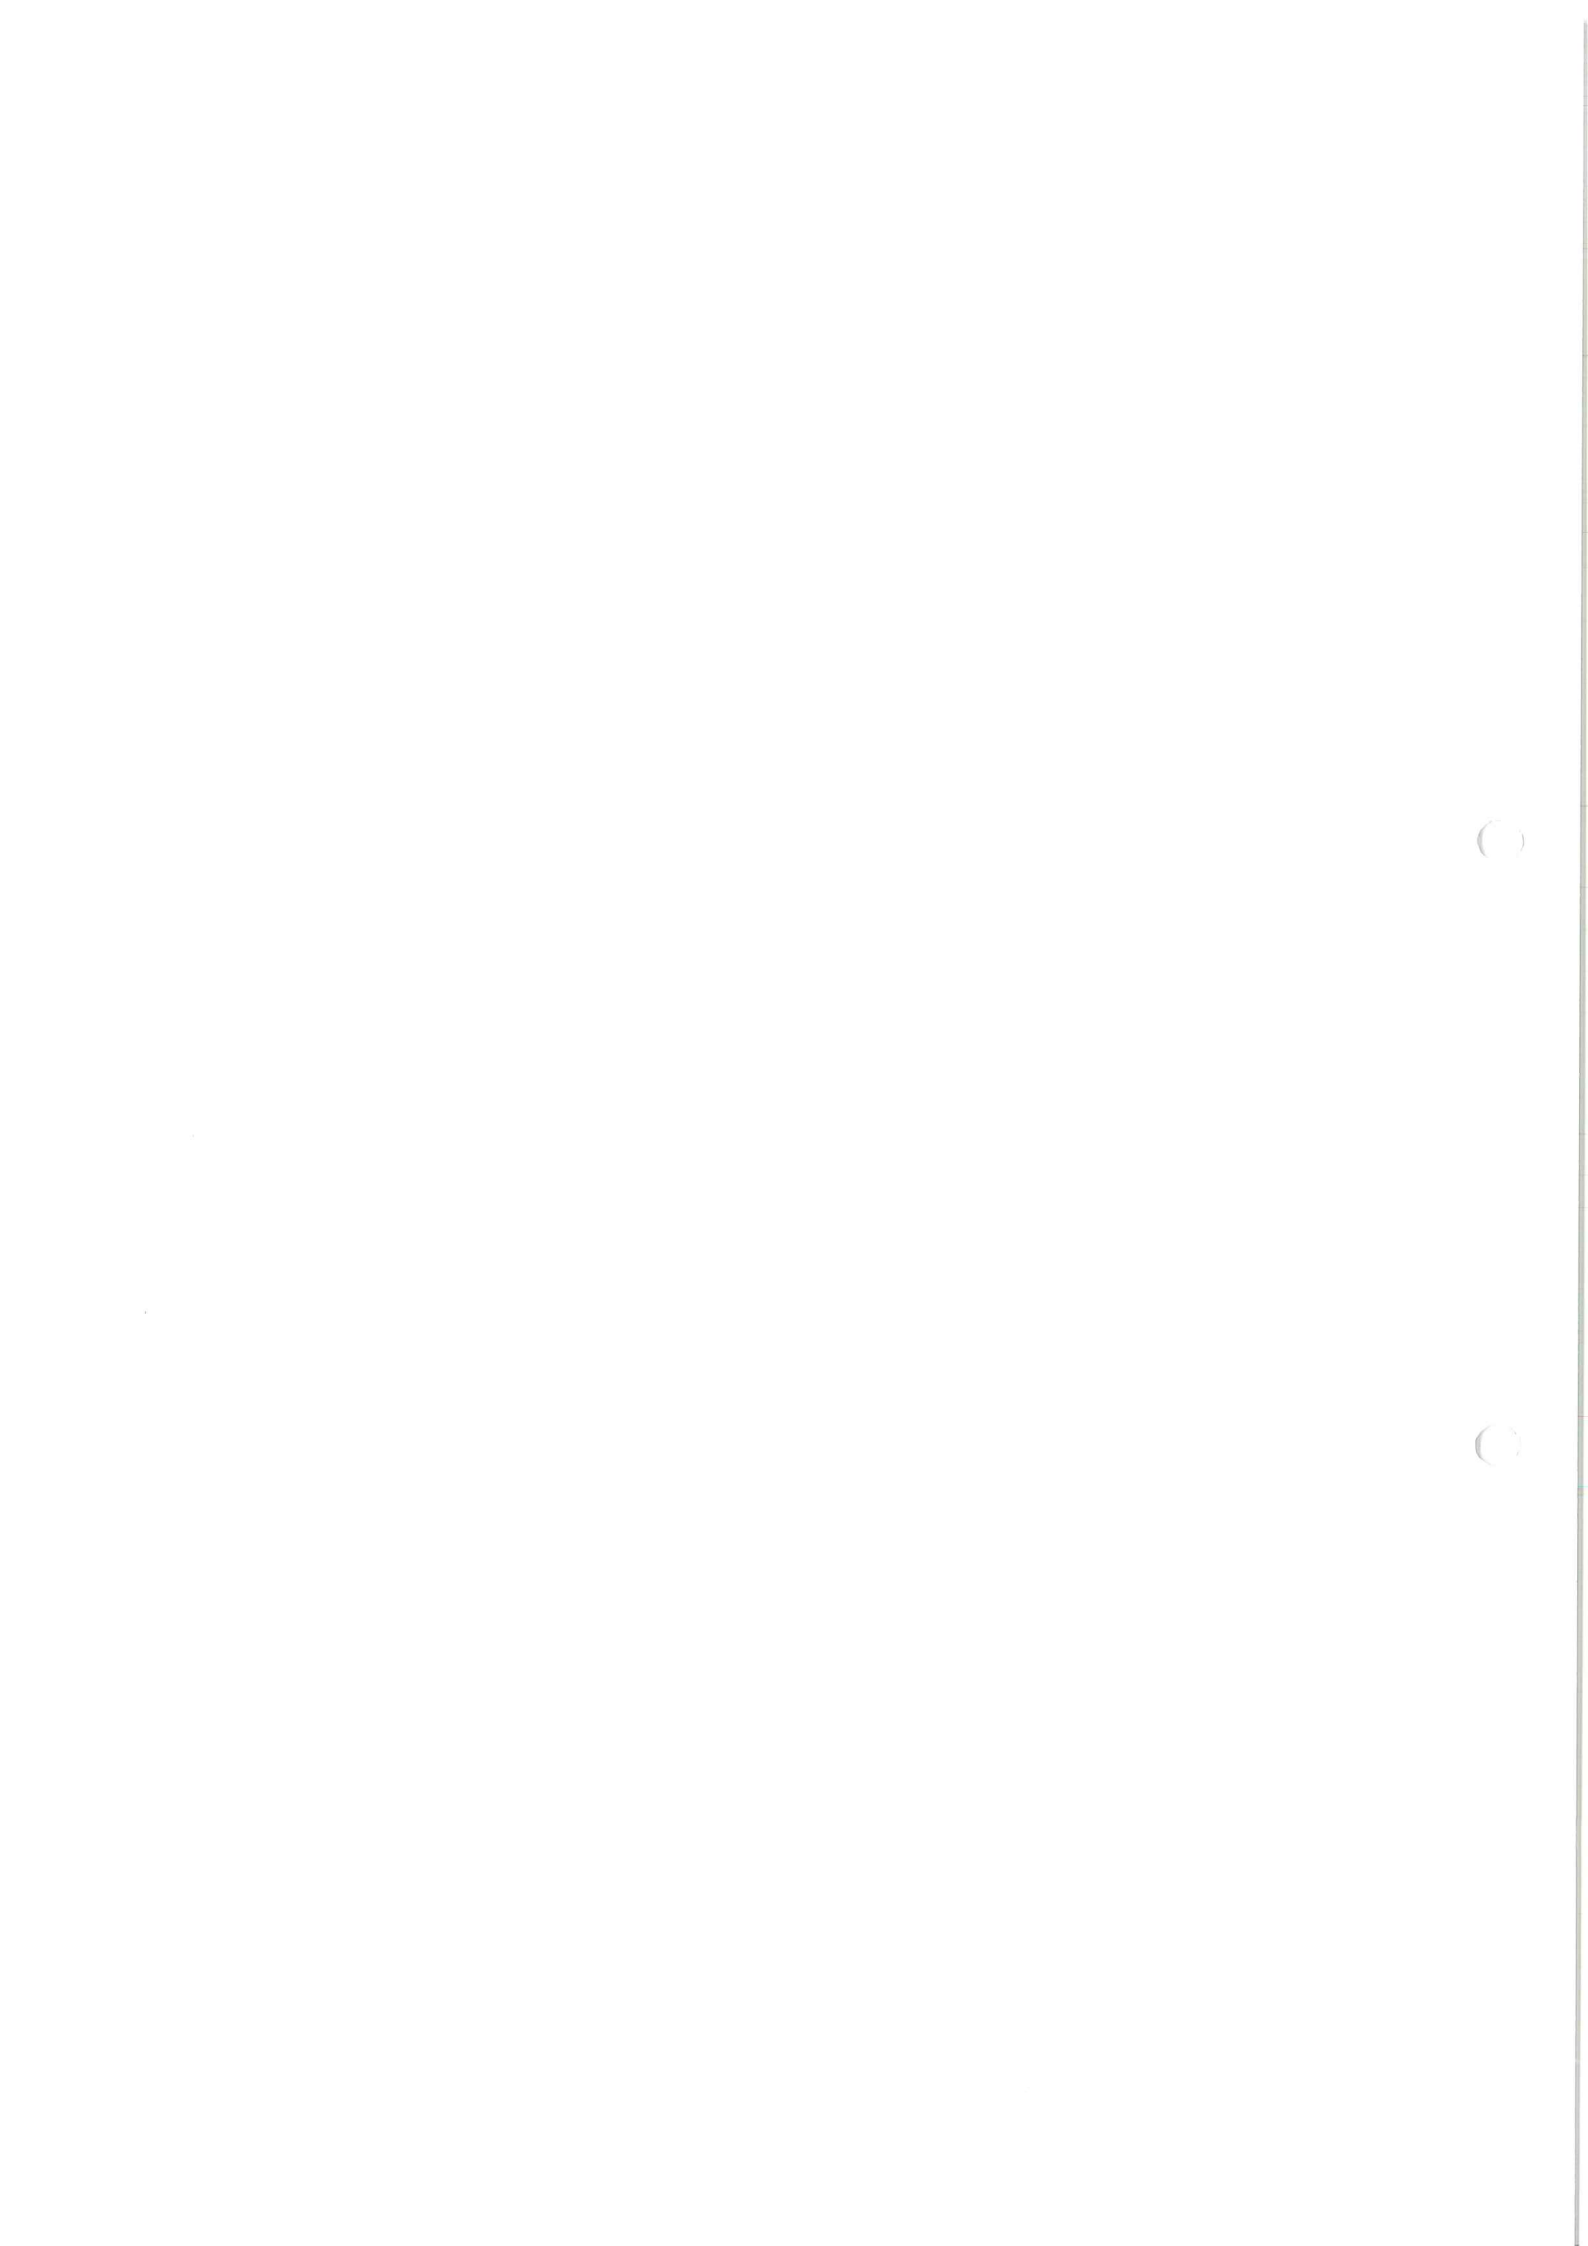

Supplement: pone.0231856.s003.pdf [file pone.0231856.s003.pdf]
