# Supplementary material for: Bleeding profile of women using a drospirenone-only pill 4 mg over nine cycles in comparison with desogestrel 0.075 mg
Source: PubMed Central journal article supplement (PMC7323950; doi:10.1371/journal.pone.0231856), 2020-06-29
Supplement: pone.0231856.s004.pdf [file pone.0231856.s004.pdf]

| ETHICS COMMITTEES CF111302 |                      |                                                          |                |                                       |           |                      |                            |                                      |                      |                                    |
|----------------------------|----------------------|----------------------------------------------------------|----------------|---------------------------------------|-----------|----------------------|----------------------------|--------------------------------------|----------------------|------------------------------------|
| NO.                        | INVESTIGATOR         | EC                                                       | Reference no.  | CHAIRMAN                              | POST CODE | CITY                 | STREET / NUMBER            | TEL NUMBER                           | FAX NUMBER           | EMAIL                              |
| 151                        | Austria<br>Egner     |                                                          |                | see leading ethics committee          |           |                      |                            |                                      |                      |                                    |
| 152                        | Lung                 | Ethikkommission der Medizinischen Universität Graz       | 24.239 act/112 | Univ.Prof. DI Dr. Peter H. Reihik     | 8030      | Graz                 | Auenburgerplatz 2          | +43 (0)310 395-13978; -17407; -17408 | +43 (0)310 395-4248  | ethikkommission@medizinuni-graz.at |
| 153                        | Ospelt               | Ethikkommission des Landes Oberösterreich                | G-106-12       | Univ.Prof. Prim. Dr. Johannes Fischer | 4020      | Linz                 | Wagner-Jurekowsky-Platz 15 | +43 (0) 056402-28001                 | +43 (0) 056402-28094 | ima.gallinger@priping.at           |
|                            | lead EC              | Ethikkommission der Medizinischen Universität Wien       | EK-10692012    | Dr. Ernst Singer                      | 1090      | Wien                 | Borschtgasse 89/9          | +43 (0) 40400-2147; -2248; -2241     | +43 (0) 40400-1990   | ethik-kom@medizinuniwien.ac.at     |
|                            | Czech Republic       |                                                          |                |                                       |           |                      |                            |                                      |                      |                                    |
| 251                        | Koloupek             | Etická komise, Centrum neurologické péče, s.r.o.         | EK 312         | MUDr. Rademír Šupal                   | 514 01    | Řepovná nad Křehovou | Jihlavská 1389             | +420 601 112 724                     | +420 601 112 725     | helenka@nurolog.cz                 |
| 252                        | Švec                 | see MEC                                                  |                |                                       |           |                      |                            |                                      |                      |                                    |
| 253                        | Huvar                | Etická komise Fakultní nemocnice Brno                    | 65ML-2011      | PharmDr. Šárka Koczková               | 625 00    | Brno                 | Jihlavská 20               | +420 52 232 788                      | +420 547 211 091     | ethickomise@hmo.cz                 |
| 254                        | Hodiska              | see MEC                                                  |                |                                       |           |                      |                            |                                      |                      |                                    |
| 255                        | Tesal                | see MEC                                                  |                |                                       |           |                      |                            |                                      |                      |                                    |
| 256                        | Rabouf               | Etická komise Fakultní nemocnice Olomouc                 | 151/2012       | MUDr. Luboš Rozumský, CSc.            | 768 52    | Olomouč-Pořádk       | 17. listopadu 1790         | +420 507 232 542                     | +420 507 232 801     | ethika.komise@hmo.cz               |
| 257                        | Lynková              |                                                          |                |                                       |           |                      |                            |                                      |                      |                                    |
| 258                        | Kocimová             |                                                          |                |                                       |           |                      |                            |                                      |                      |                                    |
| 259                        | Srkovecká            | Etická komise Fakultní nemocnice Olomouc                 | 42/12          | Doc. MUDr. Václav Horčík, CSc.        | 775 20    | Olomouc              | L. P. Pavlova 6            | +420 588 442 477                     | +420 588 442 477     | hmo.audika@fnol.cz                 |
| 260                        | Hlaváková            |                                                          |                |                                       |           |                      |                            |                                      |                      |                                    |
| 261                        | Dvořák               | Etická komise Fakultní nemocnice Brno                    | 65ML-2011      | PharmDr. Šárka Koczková               | 625 00    | Brno                 | Jihlavská 20               | +420 52 232 788                      | +420 547 211 091     | ethickomise@hmo.cz                 |
| 262                        | Hrdáňil              |                                                          |                |                                       |           |                      |                            |                                      |                      |                                    |
| 263                        | Jenček               |                                                          |                |                                       |           |                      |                            |                                      |                      |                                    |
| 264                        | Štárl                |                                                          |                |                                       |           |                      |                            |                                      |                      |                                    |
| 265                        | Škocová              |                                                          |                |                                       |           |                      |                            |                                      |                      |                                    |
| 266                        | Větrníková - Kolbova |                                                          |                |                                       |           |                      |                            |                                      |                      |                                    |
|                            | leading EC (MEC)     | Multicentrická etická komise Fakultní nemocnice v Motole | EK-110/12      | MUDr. Vladislav Šmahušas              | 150 06    | Praha 5 - Motol      | V Úvalu 84                 | +420 224 431 185; +420 224 431 197   | +420 224 431 198     | ethickomise@fnmotol.cz             |

| ETHICS COMMITTEES CF111/302  |                   |                                                                                                      |                      |                       |           |                |                        |                     |                     |                                  |
|------------------------------|-------------------|------------------------------------------------------------------------------------------------------|----------------------|-----------------------|-----------|----------------|------------------------|---------------------|---------------------|----------------------------------|
| NO.                          | INVESTIGATOR      | EC                                                                                                   | Reference no.        | CHAIRMAN              | POST CODE | CITY           | STREET / NUMBER        | TEL NUMBER          | FAX NUMBER          | EMAIL                            |
| <b>Germany</b>               |                   |                                                                                                      |                      |                       |           |                |                        |                     |                     |                                  |
| 351                          | Maier             |                                                                                                      |                      |                       |           |                |                        |                     |                     |                                  |
| see leading ethics committee |                   |                                                                                                      |                      |                       |           |                |                        |                     |                     |                                  |
| 352                          | Abwerdt           | Ethik-Kommission der Bayerischen Landesärztekammer                                                   | 7/11295              | NA                    | 81977     | München        | Mühlbauerstraße 10     | +49 89 4147 195     | +49 89 4147 290     | ethikkommission@lkaek.de         |
| 353                          | Bühling           | Ethik-Kommission der Ärztekammer Hamburg                                                             | MC-4/8/1             | NA                    | 22983     | Hamburg        | Hunboldtstr. 67 a      | +49 40 20 22 89 240 | +49 40 20 22 89 410 | ethik@bshk.de                    |
| 354                          | Burghardt         | Ethik-Kommission bei der Sächsischen Landesärztekammer                                               | EK-AMC-MCB-189 /14-1 | NA                    | 01090     | Dresden        | Schützenhöhe 19        | +49 351 8207 333    | +49 351 8207 412    | ethik@lshk.de                    |
| 355                          | Deel              |                                                                                                      |                      |                       |           |                |                        |                     |                     |                                  |
| see leading ethics committee |                   |                                                                                                      |                      |                       |           |                |                        |                     |                     |                                  |
| 356                          | Gedlich           | Ethik-Kommission der Ärztekammer Nordrhein                                                           | 2011466              | NA                    | 40174     | Düsseldorf     | Trennungsweg 0         | +49 211 4302 0      | +49 211 4302 1200   | ethik@nshk.de                    |
| 357                          | Göckler-Lepold    | Ethik-Kommission der Ärztekammer Westfalen-Lippe                                                     | 2011-075-L-A         | NA                    | 48147     | Münster        | Gartenstr. 210 - 214   | +49 251 023 2400    | +49 251 023 2478    | ethik-kommission@akwf.de         |
| 358                          | Groven            | Ethik-Kommission zur Beurteilung medizinischer Forschung am Menschen                                 | NA                   | NA                    | 30175     | Hannover       | Berliner Allee 20      | +49 511 380 2208    | +49 511 380 2119    | ethikkommission@hmk.de           |
| 359                          | Knauss            | Ethik-Kommission der Landesärztekammer Baden-Württemberg                                             | E-AM-2011-204        | NA                    | 70507     | Stuttgart      | Jahnstr. 40            | +49 711 790 89 0    | +49 711 790 89 50   | info@lshk-bw.de                  |
| 360                          | Krautzin          |                                                                                                      |                      |                       |           |                |                        |                     |                     |                                  |
| see site 352                 |                   |                                                                                                      |                      |                       |           |                |                        |                     |                     |                                  |
| 361                          | Krosch            |                                                                                                      |                      |                       |           |                |                        |                     |                     |                                  |
| see site 353                 |                   |                                                                                                      |                      |                       |           |                |                        |                     |                     |                                  |
| 362                          | Peters            |                                                                                                      |                      |                       |           |                |                        |                     |                     |                                  |
| see site 353                 |                   |                                                                                                      |                      |                       |           |                |                        |                     |                     |                                  |
| 363                          | Rover             |                                                                                                      |                      |                       |           |                |                        |                     |                     |                                  |
| see site 359                 |                   |                                                                                                      |                      |                       |           |                |                        |                     |                     |                                  |
| 364                          | Ruhrland          |                                                                                                      |                      |                       |           |                |                        |                     |                     |                                  |
| see leading ethics committee |                   |                                                                                                      |                      |                       |           |                |                        |                     |                     |                                  |
| 365                          | Abwerdt           | Ethik-Kommission des Landes Sachsen-Anhalt                                                           | EK-12/2008           | NA                    | 06848     | Dessau-Roßlau  | Kühnauer Straße 70     | +49 340 65 01 291   | +49 340 65 01 199   | ethik@lma.sachsen-anhalt.de      |
| 366                          | Büchtem           |                                                                                                      |                      |                       |           |                |                        |                     |                     |                                  |
| see leading ethics committee |                   |                                                                                                      |                      |                       |           |                |                        |                     |                     |                                  |
| 367                          | Cornel            | Ethik-Kommission der Landesärztekammer Hessen                                                        | MC 384/2011          | NA                    | 60489     | Frankfurt/Main | Im Vogelspang 3        | +49 69 07972 0      | +49 69 07972 128    | info@lshk.de                     |
| 368                          | Dillig            |                                                                                                      |                      |                       |           |                |                        |                     |                     |                                  |
| see site 352                 |                   |                                                                                                      |                      |                       |           |                |                        |                     |                     |                                  |
| 370                          | Götter-Schneemann |                                                                                                      |                      |                       |           |                |                        |                     |                     |                                  |
| see site 387                 |                   |                                                                                                      |                      |                       |           |                |                        |                     |                     |                                  |
| 371                          | Hoppe             |                                                                                                      |                      |                       |           |                |                        |                     |                     |                                  |
| see site 359                 |                   |                                                                                                      |                      |                       |           |                |                        |                     |                     |                                  |
| 372                          | Schönmair         |                                                                                                      |                      |                       |           |                |                        |                     |                     |                                  |
| see leading ethics committee |                   |                                                                                                      |                      |                       |           |                |                        |                     |                     |                                  |
| head EC                      |                   | Landesamt für Gesundheit und Soziales Berlin, Geschäftsstelle der Ethik-Kommission des Landes Berlin | 110609 - EK          | Prof. Dr. Hildebrandt | 10707     | Berlin         | Friedhöflicher Platz 1 | +49 30 90229 1220   | +49 30 9028 3883    | ethik-kommission@lsgso-berlin.de |

ETHICS COMMITTEES CF111302

| NO.                    | INVESTIGATOR         | EC                                                                                                                           | Reference no.                                                       | CHAIRMAN                                                                          | POST CODE | CITY      | STREET / NUMBER        | TEL NUMBER       | FAX NUMBER        | EMAIL                    |
|------------------------|----------------------|------------------------------------------------------------------------------------------------------------------------------|---------------------------------------------------------------------|-----------------------------------------------------------------------------------|-----------|-----------|------------------------|------------------|-------------------|--------------------------|
| <b>Hungary</b>         |                      |                                                                                                                              |                                                                     |                                                                                   |           |           |                        |                  |                   |                          |
| 451                    | Széklik              | Metropolitan Municipality St. John's Hospital and Corporated Hospitals of North Buda, Tudományi Bizottság/Research Committee | NA                                                                  | Prof. Dr. Andrács János (info dated: 24.08.2012)                                  | 1125      | Budapest  | Dózsa úk 1-3.          | NA               | NA                | NA                       |
| 452                    | Zimko                | Intézményi Kutatásaital Bizottság/institutional Research Ethics Committee                                                    | NA                                                                  | Dr. János Rosta (info dated: 27.05.2011)                                          | 3000      | Hévíz     | Bátaszék Bólihi út: 10 | NA               | NA                | NA                       |
| 453                    | Lampár               | Ferencvárosi Egyszázégyi Szolgálató Kórházakoz Nemzeti Biomedicinaitonal Research Ethics Komittee                            | NA                                                                  | Dr. Imre Gábor (last info dated: 03.04.2012)                                      | 1088      | Budapest  | Mester u. 45.          | NA               | NA                | NA                       |
| 454                    | Herndl               | Markhor Favens Hospital Health Provider Nemzeti Advanced Utility Kft., Bizottság/institutional Research Ethics Committee     | NA                                                                  | Dr. László Herndl (last info dated: 23.05.2011)                                   | 3000      | Egér      | Széchényi u. 37-39.    | NA               | NA                | NA                       |
| 455                    | Székly               | Ferencvárosi Egyszázégyi Szolgálató Kórházakoz Nemzeti Kft., Bizottság/institutional Research Ethics Committee               | NA                                                                  | Dr. Imre Gábor (last info dated: 03.04.2012)                                      | 1095      | Budapest  | Mester u. 45.          | NA               | NA                | NA                       |
| 456                    | Urbán                | Metropolitan Municipality St. Imre Hospital , Kutatásaital Bizottság/institutional Research Ethics Committee                 | NA                                                                  | No details were that time available.(info dated: 20.05.2011)                      | 1116      | Budapest  | Téliúny út: 12-15.     | NA               | NA                | NA                       |
| 457                    | Pákoz                | Komárom -Esztergom County St. Barbara Hospital, Intézményi Kutatásaital Bizottság/institutional Research Ethics Committee    | NA                                                                  | Dr. Gábor Nagy (info dated: 08.08.2011)                                           | 2800      | Tatabánya | Dózsa György út: 77.   | NA               | NA                | NA                       |
| 458                    | Gemmill              | Metropolitan Municipality Újpesti Hospital, Kutatásaital Bizottság/institutional Research Ethics Komittee                    | NA                                                                  | Dr. Tibor Miliák (info dated: 07.08.2011)                                         | 1145      | Budapest  | Újpesti út: 22-41.     | NA               | NA                | NA                       |
| 459                    | Horvath              | Ferencvárosi Egyszázégyi Szolgálató Kórházakoz Nemzeti Kft., Bizottság/institutional Research Ethics Komittee                | NA                                                                  | Dr. Imre Gábor (last info dated: 03.04.2012)                                      | 1095      | Budapest  | Mester u. 45.          | NA               | NA                | NA                       |
| 460                    | Szemplósi            | Institutional Ethics Committee of St. Rókuszi Ferenc Hospital                                                                | NA                                                                  | Dr. János Tóth (last info dated: 17.05.2014)                                      | 3800      | Székes    | Kassai út: 45-49       | NA               | NA                | NA                       |
| 461                    | Mahr                 | Institutional Ethics Committee of St. John Hospital and North-Buda United Hospitals,                                         | NA                                                                  | Prof. Dr. Andrács János (info dated: 24.08.2012)                                  | 1125      | Budapest  | Dózsa úk: 1-3          | NA               | NA                | NA                       |
| 462                    | NOVÁK                | Institutional Ethics Committee of Ferencvárosi Health Provider Nemzeti Advanced Public Utility Kft.                          | NA                                                                  | Dr. Imre Gábor (last info dated: 03.04.2012)                                      | 1095      | Budapest  | Mester u. 45           | NA               | NA                | NA                       |
| 463                    | SZÉKELY              |                                                                                                                              |                                                                     | Dr. János Gábor (last info dated: 03.04.2012) <small>see 462</small>              | 1095      | Budapest  | Mester u. 45           | NA               | NA                | NA                       |
| 464                    | Pálmai               | Institutional Ethics Committee of Jászvárosi Health Provider Kft.                                                            | NA                                                                  | Dr. Judit Fenyő (last info dated: 11.02.2014), secretary: Julianna Juhász Szabóné | 1094      | Budapest  | Aurora u. 25-28        | NA               | NA                | NA                       |
| <b>Poland</b>          |                      |                                                                                                                              |                                                                     |                                                                                   |           |           |                        |                  |                   |                          |
| lead EC                |                      |                                                                                                                              | Medical Research Council Ethics Committee For Clinical Pharmacology | 1902-0/2013-5KL                                                                   | 1051      | Budapest  | Arany János u. 68.     | +36 1 785 1195   | +36 1 785 0188    | istvanmagyar@pmai.gov.hu |
| No local ECs in Poland |                      |                                                                                                                              |                                                                     |                                                                                   |           |           |                        |                  |                   |                          |
| 551                    | Jaczyński            |                                                                                                                              |                                                                     |                                                                                   |           |           |                        |                  |                   |                          |
| 552                    | Falks                |                                                                                                                              |                                                                     |                                                                                   |           |           |                        |                  |                   |                          |
| 553                    | Witkowska-Sawicka    |                                                                                                                              |                                                                     |                                                                                   |           |           |                        |                  |                   |                          |
| 554                    | Esler                |                                                                                                                              |                                                                     |                                                                                   |           |           |                        |                  |                   |                          |
| 555                    | Chemiński            |                                                                                                                              |                                                                     |                                                                                   |           |           |                        |                  |                   |                          |
| 556                    | Jabłkowski           |                                                                                                                              |                                                                     |                                                                                   |           |           |                        |                  |                   |                          |
| 557                    | Paćka                |                                                                                                                              |                                                                     |                                                                                   |           |           |                        |                  |                   |                          |
| 558                    | Jędrzejczyk          |                                                                                                                              |                                                                     |                                                                                   |           |           |                        |                  |                   |                          |
| 559                    | Piła-Dołwicka        | Ethics Committee at Local Medical Chamber ul. Krupnicza 11A 31-123 Kraków                                                    | Opinion No.: 9 /KB/LOU/2012                                         | Marinusz Janikowski, MD                                                           | 31-123    | Kraków    | Krupnicza 11 A         | +48 12 619 17 12 | + 48 12 422 57 55 | ajankowicz@pbe.krakow.pl |
| 560                    | Adamczyk-Guszcza     |                                                                                                                              |                                                                     |                                                                                   |           |           |                        |                  |                   |                          |
| 561                    | Makowski             |                                                                                                                              |                                                                     |                                                                                   |           |           |                        |                  |                   |                          |
| 562                    | Skrzypulec-Piła      |                                                                                                                              |                                                                     |                                                                                   |           |           |                        |                  |                   |                          |
| 563                    | Niemcewicz           |                                                                                                                              |                                                                     |                                                                                   |           |           |                        |                  |                   |                          |
| 564                    | Bartkowiak-Kozłowska |                                                                                                                              |                                                                     |                                                                                   |           |           |                        |                  |                   |                          |
| 565                    | Jędrzejczyk          |                                                                                                                              |                                                                     |                                                                                   |           |           |                        |                  |                   |                          |
| 566                    | Piła                 |                                                                                                                              |                                                                     |                                                                                   |           |           |                        |                  |                   |                          |
| 567                    | Rudnicka             |                                                                                                                              |                                                                     |                                                                                   |           |           |                        |                  |                   |                          |
| 568                    | Tomaszewski          |                                                                                                                              |                                                                     |                                                                                   |           |           |                        |                  |                   |                          |

| NO.                                | INVESTIGATOR           | EC | Reference no. | CHAIRMAN | POST CODE | CITY | STREET / NUMBER | TEL NUMBER | FAX NUMBER | EMAIL |
|------------------------------------|------------------------|----|---------------|----------|-----------|------|-----------------|------------|------------|-------|
| <b>ETHICS COMMITTEES CF111/302</b> |                        |    |               |          |           |      |                 |            |            |       |
| <b>Romania</b>                     |                        |    |               |          |           |      |                 |            |            |       |
| 851                                | Witness (not approved) |    |               |          |           |      |                 |            |            |       |
| 852                                | Germany                |    |               |          |           |      |                 |            |            |       |
| 853                                | Dominican              |    |               |          |           |      |                 |            |            |       |
| 854                                | Chemically approved    |    |               |          |           |      |                 |            |            |       |
| 855                                | Tulane                 |    |               |          |           |      |                 |            |            |       |
| 856                                | Multinational approved |    |               |          |           |      |                 |            |            |       |
| 857                                | Cornell                |    |               |          |           |      |                 |            |            |       |
| 858                                | Roth                   |    |               |          |           |      |                 |            |            |       |
| 859                                | Chemically approved    |    |               |          |           |      |                 |            |            |       |
| 860                                | Chemically approved    |    |               |          |           |      |                 |            |            |       |
| 861                                | Chemically approved    |    |               |          |           |      |                 |            |            |       |
| 862                                | Chemically approved    |    |               |          |           |      |                 |            |            |       |
| 863                                | Chemically approved    |    |               |          |           |      |                 |            |            |       |
| 864                                | Chemically approved    |    |               |          |           |      |                 |            |            |       |
| 865                                | Chemically approved    |    |               |          |           |      |                 |            |            |       |
| 866                                | Chemically approved    |    |               |          |           |      |                 |            |            |       |
| 867                                | Chemically approved    |    |               |          |           |      |                 |            |            |       |
| 868                                | Chemically approved    |    |               |          |           |      |                 |            |            |       |
| 869                                | Chemically approved    |    |               |          |           |      |                 |            |            |       |
| 870                                | Chemically approved    |    |               |          |           |      |                 |            |            |       |
| 871                                | Chemically approved    |    |               |          |           |      |                 |            |            |       |
| 872                                | Chemically approved    |    |               |          |           |      |                 |            |            |       |
| 873                                | Chemically approved    |    |               |          |           |      |                 |            |            |       |
| 874                                | Chemically approved    |    |               |          |           |      |                 |            |            |       |
| 875                                | Chemically approved    |    |               |          |           |      |                 |            |            |       |
| 876                                | Chemically approved    |    |               |          |           |      |                 |            |            |       |
| 877                                | Chemically approved    |    |               |          |           |      |                 |            |            |       |
| 878                                | Chemically approved    |    |               |          |           |      |                 |            |            |       |
| 879                                | Chemically approved    |    |               |          |           |      |                 |            |            |       |
| 880                                | Chemically approved    |    |               |          |           |      |                 |            |            |       |
| 881                                | Chemically approved    |    |               |          |           |      |                 |            |            |       |
| 882                                | Chemically approved    |    |               |          |           |      |                 |            |            |       |
| 883                                | Chemically approved    |    |               |          |           |      |                 |            |            |       |
| 884                                | Chemically approved    |    |               |          |           |      |                 |            |            |       |
| 885                                | Chemically approved    |    |               |          |           |      |                 |            |            |       |
| 886                                | Chemically approved    |    |               |          |           |      |                 |            |            |       |
| 887                                | Chemically approved    |    |               |          |           |      |                 |            |            |       |
| 888                                | Chemically approved    |    |               |          |           |      |                 |            |            |       |
| 889                                | Chemically approved    |    |               |          |           |      |                 |            |            |       |
| 890                                | Chemically approved    |    |               |          |           |      |                 |            |            |       |
| 891                                | Chemically approved    |    |               |          |           |      |                 |            |            |       |
| 892                                | Chemically approved    |    |               |          |           |      |                 |            |            |       |
| 893                                | Chemically approved    |    |               |          |           |      |                 |            |            |       |
| 894                                | Chemically approved    |    |               |          |           |      |                 |            |            |       |
| 895                                | Chemically approved    |    |               |          |           |      |                 |            |            |       |
| 896                                | Chemically approved    |    |               |          |           |      |                 |            |            |       |
| 897                                | Chemically approved    |    |               |          |           |      |                 |            |            |       |
| 898                                | Chemically approved    |    |               |          |           |      |                 |            |            |       |
| 899                                | Chemically approved    |    |               |          |           |      |                 |            |            |       |
| 900                                | Chemically approved    |    |               |          |           |      |                 |            |            |       |
| 901                                | Chemically approved    |    |               |          |           |      |                 |            |            |       |
| 902                                | Chemically approved    |    |               |          |           |      |                 |            |            |       |
| 903                                | Chemically approved    |    |               |          |           |      |                 |            |            |       |
| 904                                | Chemically approved    |    |               |          |           |      |                 |            |            |       |
| 905                                | Chemically approved    |    |               |          |           |      |                 |            |            |       |
| 906                                | Chemically approved    |    |               |          |           |      |                 |            |            |       |
| 907                                | Chemically approved    |    |               |          |           |      |                 |            |            |       |
| 908                                | Chemically approved    |    |               |          |           |      |                 |            |            |       |
| 909                                | Chemically approved    |    |               |          |           |      |                 |            |            |       |
| 910                                | Chemically approved    |    |               |          |           |      |                 |            |            |       |
| 911                                | Chemically approved    |    |               |          |           |      |                 |            |            |       |
| 912                                | Chemically approved    |    |               |          |           |      |                 |            |            |       |
| 913                                | Chemically approved    |    |               |          |           |      |                 |            |            |       |
| 914                                | Chemically approved    |    |               |          |           |      |                 |            |            |       |
| 915                                | Chemically approved    |    |               |          |           |      |                 |            |            |       |
| 916                                | Chemically approved    |    |               |          |           |      |                 |            |            |       |
| 917                                | Chemically approved    |    |               |          |           |      |                 |            |            |       |
| 918                                | Chemically approved    |    |               |          |           |      |                 |            |            |       |
| 919                                | Chemically approved    |    |               |          |           |      |                 |            |            |       |
| 920                                | Chemically approved    |    |               |          |           |      |                 |            |            |       |
| 921                                | Chemically approved    |    |               |          |           |      |                 |            |            |       |
| 922                                | Chemically approved    |    |               |          |           |      |                 |            |            |       |
| 923                                | Chemically approved    |    |               |          |           |      |                 |            |            |       |
| 924                                | Chemically approved    |    |               |          |           |      |                 |            |            |       |
| 925                                | Chemically approved    |    |               |          |           |      |                 |            |            |       |
| 926                                | Chemically approved    |    |               |          |           |      |                 |            |            |       |
| 927                                | Chemically approved    |    |               |          |           |      |                 |            |            |       |
| 928                                | Chemically approved    |    |               |          |           |      |                 |            |            |       |
| 929                                | Chemically approved    |    |               |          |           |      |                 |            |            |       |
| 930                                | Chemically approved    |    |               |          |           |      |                 |            |            |       |
| 931                                | Chemically approved    |    |               |          |           |      |                 |            |            |       |
| 932                                | Chemically approved    |    |               |          |           |      |                 |            |            |       |
| 933                                | Chemically approved    |    |               |          |           |      |                 |            |            |       |
| 934                                | Chemically approved    |    |               |          |           |      |                 |            |            |       |
| 935                                | Chemically approved    |    |               |          |           |      |                 |            |            |       |
| 936                                | Chemically approved    |    |               |          |           |      |                 |            |            |       |
| 937                                | Chemically approved    |    |               |          |           |      |                 |            |            |       |
| 938                                | Chemically approved    |    |               |          |           |      |                 |            |            |       |
| 939                                | Chemically approved    |    |               |          |           |      |                 |            |            |       |
| 940                                | Chemically approved    |    |               |          |           |      |                 |            |            |       |
| 941                                | Chemically approved    |    |               |          |           |      |                 |            |            |       |
| 942                                | Chemically approved    |    |               |          |           |      |                 |            |            |       |
| 943                                | Chemically approved    |    |               |          |           |      |                 |            |            |       |
| 944                                | Chemically approved    |    |               |          |           |      |                 |            |            |       |
| 945                                | Chemically approved    |    |               |          |           |      |                 |            |            |       |
| 946                                | Chemically approved    |    |               |          |           |      |                 |            |            |       |
| 947                                | Chemically approved    |    |               |          |           |      |                 |            |            |       |
| 948                                | Chemically approved    |    |               |          |           |      |                 |            |            |       |
| 949                                | Chemically approved    |    |               |          |           |      |                 |            |            |       |
| 950                                | Chemically approved    |    |               |          |           |      |                 |            |            |       |
| 951                                | Chemically approved    |    |               |          |           |      |                 |            |            |       |
| 952                                | Chemically approved    |    |               |          |           |      |                 |            |            |       |
| 953                                | Chemically approved    |    |               |          |           |      |                 |            |            |       |
| 954                                | Chemically approved    |    |               |          |           |      |                 |            |            |       |
| 955                                | Chemically approved    |    |               |          |           |      |                 |            |            |       |
| 956                                | Chemically approved    |    |               |          |           |      |                 |            |            |       |
| 957                                | Chemically approved    |    |               |          |           |      |                 |            |            |       |
| 958                                | Chemically approved    |    |               |          |           |      |                 |            |            |       |
| 959                                | Chemically approved    |    |               |          |           |      |                 |            |            |       |
| 960                                | Chemically approved    |    |               |          |           |      |                 |            |            |       |
| 961                                | Chemically approved    |    |               |          |           |      |                 |            |            |       |
| 962                                | Chemically approved    |    |               |          |           |      |                 |            |            |       |
| 963                                | Chemically approved    |    |               |          |           |      |                 |            |            |       |
| 964                                | Chemically approved    |    |               |          |           |      |                 |            |            |       |
| 965                                | Chemically approved    |    |               |          |           |      |                 |            |            |       |
| 966                                | Chemically approved    |    |               |          |           |      |                 |            |            |       |
| 967                                | Chemically approved    |    |               |          |           |      |                 |            |            |       |
| 968                                | Chemically approved    |    |               |          |           |      |                 |            |            |       |
| 969                                | Chemically approved    |    |               |          |           |      |                 |            |            |       |
| 970                                | Chemically approved    |    |               |          |           |      |                 |            |            |       |
| 971                                | Chemically approved    |    |               |          |           |      |                 |            |            |       |
| 972                                | Chemically approved    |    |               |          |           |      |                 |            |            |       |
| 973                                | Chemically approved    |    |               |          |           |      |                 |            |            |       |
| 974                                | Chemically approved    |    |               |          |           |      |                 |            |            |       |
| 975                                | Chemically approved    |    |               |          |           |      |                 |            |            |       |
| 976                                | Chemically approved    |    |               |          |           |      |                 |            |            |       |
| 977                                | Chemically approved    |    |               |          |           |      |                 |            |            |       |
| 978                                | Chemically approved    |    |               |          |           |      |                 |            |            |       |
| 979                                | Chemically approved    |    |               |          |           |      |                 |            |            |       |
| 980                                | Chemically approved    |    |               |          |           |      |                 |            |            |       |
| 981                                | Chemically approved    |    |               |          |           |      |                 |            |            |       |
| 982                                | Chemically approved    |    |               |          |           |      |                 |            |            |       |
| 983                                | Chemically approved    |    |               |          |           |      |                 |            |            |       |
| 984                                | Chemically approved    |    |               |          |           |      |                 |            |            |       |
| 985                                | Chemically approved    |    |               |          |           |      |                 |            |            |       |
| 986                                | Chemically approved    |    |               |          |           |      |                 |            |            |       |
| 987                                | Chemically approved    |    |               |          |           |      |                 |            |            |       |
| 988                                | Chemically approved    |    |               |          |           |      |                 |            |            |       |
| 989                                | Chemically approved    |    |               |          |           |      |                 |            |            |       |
| 990                                | Chemically approved    |    |               |          |           |      |                 |            |            |       |
| 991                                | Chemically approved    |    |               |          |           |      |                 |            |            |       |
| 992                                | Chemically approved    |    |               |          |           |      |                 |            |            |       |
| 993                                | Chemically approved    |    |               |          |           |      |                 |            |            |       |
| 994                                | Chemically approved    |    |               |          |           |      |                 |            |            |       |
| 995                                | Chemically approved    |    |               |          |           |      |                 |            |            |       |
| 996                                | Chemically approved    |    |               |          |           |      |                 |            |            |       |
| 997                                | Chemically approved    |    |               |          |           |      |                 |            |            |       |
| 998                                | Chemically approved    |    |               |          |           |      |                 |            |            |       |
| 999                                | Chemically approved    |    |               |          |           |      |                 |            |            |       |
| 1000                               | Chemically approved    |    |               |          |           |      |                 |            |            |       |
