# Supplementary material for: Bleeding profile of women using a drospirenone-only pill 4 mg over nine cycles in comparison with desogestrel 0.075 mg
Source: PubMed Central journal article supplement (PMC7323950; doi:10.1371/journal.pone.0231856), 2020-06-29
Supplement: pone.0231856.s005.pdf [file pone.0231856.s005.pdf]

## **Appendix 1**

### **List of IECs or IRBs -Study**

#### **Czech Republic (Central IEC)**

Etická komise pro multicentrické klinické hodnocení

Chair: Vratislav Šmelhaus, MD

Contact person: Mgr. Vlastimil Holíček

V úvalu 84

150 06 Praha 5 – Motol

Phone: + 420 224 431 195, + 420 224 431 197, mobile: 00 420 721 309 300

Fax: + 420 224 431 196

E-mail: etickakomise@fnmotol.cz

#### **Germany**

Leading IEC

Ethikkommission des Landes Sachsen-Anhalt, Geschäftsstelle

Contact person: Henning Richter

Kühnauer Straße 70

06846 Dessau –Roßlau

Phone: +49 340 65 01 291

Fax: +49 340 65 01 199

E-mail: ek@lav.ms.sachsen-anhalt.de

Ethik-Kommission der Bayerischen Landesärztekammer

Contact person: Ms. Henne

Mühlbaurstraße 16

81677 München

Phone: +49 89 4147 165, +49 89 4147 335 (Ms. Henne)

Fax: +49 89 4147 280, +49 89 4147 334 (Ms. Henne)<sup>1</sup>

E-mail: ethikkommission@blaek.de

Ethikkommission der Landesärztekammer Hessen

Contact person: Gisela Gerke

Im Vogelsgesang 3

60488 Frankfurt/Main

Phone: +49 69 97672 0, +49 69 97672 119 (G. Gerke)

Fax: + 49 69 97672 128, +49 69 97672 377 (G. Gerke)

E-mail: info@laekh.de, ethikkommission@laekh.de, gisela.gerke@laekh.de

Ethikkommission der Ärztekammer Nordrhein

Contact persons: Andrea Nassiri, Claire Rivoire

Tersteegenstr. 9

40474 Düsseldorf

Phone: + 49 211 4302 1581, +49 211 4302 2272 (A. Nassiri),

+49 211 4302 2273 (C. Rivoire)

Fax: +49 211 4302 1585, +49 211 4302 2279

E-mail: ethik@aekno.de

Ethik-Kommission der Ärztekammer Hamburg  
Chair: Karin Küchenmeister  
Humboldtstr. 67 a  
22083 Hamburg  
Phone: +49 40 20 22 99 0, +49 40 20 22 99 240  
Fax: +49 40 20 22 99 400, +49 40 20 22 99 410  
E-mail: post@aekeh.de, ethik@aekeh.de

Landesamt für Gesundheit und Soziales Berlin, Geschäftsstelle der Ethik-Kommission des Landes Berlin  
Contact persons: Sabine Pieprzyk, Susann-Isabelle Grambow  
Fehrbelliner Platz 1  
10707 Berlin  
Phone: +49 30 90229 1220, +49 30 90229 1227 (S. Pieprzyk),  
+49 30 90229 1228 (I. Grambow)  
Fax: +49 30 9028 3383  
E-mail: poststelle@lageso.berlin.de, sabine.pieprzyk@lageso.berlin.de ,  
isabelle.grambow@lageso.berlin.de

Ethikkommission der Landesärztekammer Baden-Württemberg  
Contact person: Anna Gola  
Jahnstr. 40  
70597 Stuttgart  
Phone: +49 711 769 89 0, +49 711 769 89 60 or 55,  
Fax: +49 711 769 89 50, +49 711 769 89 856  
E-mail: info@laek-bw.de, anna.gola@laek-bw.de

Ethikkommission zur Beurteilung medizinischer Forschung am Menschen  
Contact person: Kai Bogs  
Berliner Allee 20  
30175 Hannover  
Phone: +49 511 380 2208  
Fax: +49 511 380 2119  
E-mail: ethikkommission@aeKn.de

## **Hungary**

Institutional Ethics Committee  
Szegedi úti Szakrendelő  
3  
XIII. kerületi Egészségügyi Szolgálat Közhasznú Nonprofit Kft.  
Chair: Dr. Klára ESZTÓ  
Szegedi út 17  
1139 Budapest  
Phone: +36 1 4524 200

Institutional Research Ethics Committee  
Ferencvárosi Egészségügyi Szolgáltató Kiemelten Közhasznú Nonprofit Kft.

Chair: Dr. Imre Guller  
Mester u. 45  
1095 Budapest  
Phone: +36 1 4554 570  
Fax: +36 1 4554 504  
E-mail: gullerimre@gmail.com

Clinical Research Ethics Committee  
Egyesített Szent István és Szent László Kórház – Rendelőintézet  
Chair: Dr. Dénes Bánhegyi  
Nagyvárad tér 1  
1096 Budapest  
Phone: +36 1 4558 102  
Fax: +36 1 2156 501  
E-mail: orv\_ig@laszlokorhaz.hu  
Lead EC

Medical Research Council  
Ethics Committee for Clinical Pharmacology  
Chair: Prof. Dr. Zsuzsanna Füst  
Phone contact: Istvánné Magyarai  
Arany J. u. 6–8  
4  
1051 Budapest  
Phone: +36 1 7951–195, +36 30 7951–195  
Fax: +36 1 7950–168  
E-mail: istvanne.magyarai@emmi.gov.hu

**Poland (Central IEC)**  
Ethics Committee at Local Medical Chamber  
Chair: Mariusz Janikowski MD  
ul. Krupnicza 11A  
31-123 Kraków  
Phone: +48 12 619 17 12  
Fax: +48 12 422 57 55  
E-mail: aneta@oil.org.pl.

**Romania (Central IEC)**  
Comisia Nationala de Etica pentru Studiul Clinic al Medicamentului  
Chair: Prof. Dr. Sava Dumitrescu  
011478 Bucharest  
str. Aviator Sanatescu, nr.48, sector 1  
Phone: +4031 4051076  
Fax: +4031 4051075

**List of IECs or IRBs – Study 2**  
**Austria (Central IEC)**

Ethikkommission der Medizinischen Universität Wien  
Borschkegasse 8b/E06

1090 Wien  
Phone: +43 (01) 40400-2147, -2248, -2241  
Fax: +43 (01) 40400-1690  
E-mail: etik-kom@meduniwien.ac.at

**Czech Republic (Central IEC)**

Multicentrická etická komise Fakultní nemocnice v Motole  
Chair: Vratislav Šmelhaus, MD  
V úvalu 84  
150 06 Praha 5 – Motol  
Phone: + 420 224 431 195, + 420 224 431 197,  
Fax: + 420 224 431 196  
E-mail: etickakomise@fnmotol.cz

Etická komise, Centrum neurologické péče, s. r. o.  
Chair: MUDr. Radomír Štrupl  
Jiráskova 1389  
51601 Rychnov nad Kněžnou  
Phone: +420 491 112 724  
Fax: +420 491 112 725  
E-mail: helena@neurolog.cz  
1

Etická komise Fakultní nemocnice Brno  
Chair: PharmDr. Šárka Kozáková  
Jihlavská 20  
62500 Brno  
Phone: +420 532 232 798  
Fax: +420 547 211 961  
E-mail: etickakomise@fnbrno.cz

Etická komise Fakultní nemocnice Ostrava  
Chair: MUDr. Luděk Rožnovský, CSc.  
17. listopadu 1790  
70852 Ostrava-Poruba  
Phone: +420 597 372 542  
Fax: +420 597 374 801  
E-mail: eticka.komise@fno.cz

Etická komise Fakultní nemocnice Olomouc  
Chair: Doc. MUDr. Vladko Horčíčka, CSc.  
I. P. Pavlova 6  
77520 Olomouc  
Phone: +420 588 442 477  
Fax: +420 588 442 477  
E-mail: iveta.sudolska@fnol.cz

**Germany**

Leading IEC

Landesamt für Gesundheit und Soziales Berlin, Geschäftsstelle der Ethik-Kommission des Landes Berlin

Contact person: Dr. Christian von Dewitz

Fehrbelliner Platz 1

10707 Berlin

Phone: +49 30 90229 1220

Fax: +49 30 9028 3383

E-mail: [ethik-kommission@lageso.berlin.de](mailto:ethik-kommission@lageso.berlin.de)

Ethik-Kommission der Ärztekammer Hamburg

Chair: Karin Küchenmeister

Humboldtstr. 67 a

22083 Hamburg

Phone: +49 40 20 22 99 240

Fax: +49 40 20 22 99 410

E-mail: [ethik@aekeh.de](mailto:ethik@aekeh.de)

Ethikkommission bei der Sächsischen Landesärztekammer

Schützenhöhe 16

01099 Dresden

Phone: +49 351 8267 333

Fax: +49 351 8267 412

E-mail: [ethik@slaek.de](mailto:ethik@slaek.de)

Ethikkommission zur Beurteilung medizinischer Forschung am Menschen

Contact person: Kai Bogs

Berliner Allee 20

30175 Hannover

Phone: +49 511 380 2208

Fax: +49 511 380 2119

E-mail: [ethikkommission@aekn.de](mailto:ethikkommission@aekn.de)

Ethik-Kommission der Bayerischen Landesärztekammer

Contact person: Mrs. Schulz Kuhn

Mühlbauerstraße 16

81677 München

Phone: +49 89 4147 165

Fax: +49 89 4147 280

E-mail: [ethikkommission@blaek.de](mailto:ethikkommission@blaek.de)

Ethikkommission des Landes Sachsen-Anhalt, Geschäftsstelle

Contact person: Henning Richter

Kühnauer Straße 70

06846 Dessau -Roßlau

Phone: +49 340 65 01 291

Fax: +49 340 65 01 199

E-mail: ek@lav.ms.sachsen-anhalt.de

Ethikkommission der Landesärztekammer Hessen

Contact person: Gisela Gerke

Im Vogelsgesang 3

60488 Frankfurt/Main

Phone: +49 69 97672 0,

Fax: + 49 69 97672 128,

E-mail: info@laekh.de, info@laekh.de

Ethikkommission der Landesärztekammer Baden-Württemberg

Contact person: Anna Gola

Jahnstr. 40

70597 Stuttgart<sub>4</sub>

Phone: +49 711 769 89 0

Fax: +49 711 769 89 50

E-mail: info@laek-bw.de

### **Hungary**

Metropolitan Municipality St. John's Hospital and Corporated Hospitals of North Buda, Tudományos Bizottság/Research Committee

Chair: Prof. Dr. András Jánosi

Diós árok 1-3.

1125 Budapest

Intézményi Kutatásetikai Bizottság/Institutional Research Ethics Committee

Chair: Dr. Ildikó Rosta

Balassi Bálint str. 16

3000 Hatvan

Ferencvárosi Egészségügyi Szolgáltató Kiemelkedően Közhasznú Nonprofit Kft.

Intézményi

Kutatásetikai Bizottság/Institutional Research Ethics Committee

Chair: Dr. Imre Guller

Mester u. 45.

1095 Budapest

Markhot Ferenc Hospital Health Provider Nonprofit Advanced Utility Kft.,

Intézményi

Kutatásetikai Bizottság/Institutional Research Ethics Committee

Chair: László Hernádi

Széchenyi u. 27-29.

3300 Eger<sub>5</sub>

Komárom -Esztergom County St. Borbala Hospital, Intézményi Kutatásetikai Bizottság/Institutional Research Ethics Committee

Chair: Dr. Gábor Nagy

Dózsa György str. 77.  
2800 Tatabánya

Institutional Ethics Committee of II. Rákóczi Ferenc Hospital

Chair:

Kassai út 45-49  
3800 Szikszó

Institutional Ethics Committee of St. John Hospital and North-Buda United Hospitals,

Chair: Prof. Dr. András Jánosi

Diós árok 1-3.  
1125 Budapest

Institutional Ethics Committee of Ferencvárosi Health Provider Nonprofit  
Advanced Public

Utility Kft.

Chair: Dr. Imre Guller

Mester u. 45.  
1095 Budapest

Institutional Ethics Committee of Józsefvárosi Health Provider Kft.

Auróra u. 22-28

1084 Budapest

Lead EC

Medical Research Council

Ethics Committee for Clinical Pharmacology

Chair: Prof. Dr. Zsuzsanna Fürst

Phone contact: Istvánné Magyarai

Arany János u. 6-8.

1051 Budapest

Phone: +36 1 7951195

Fax: +36 1 7950-168

E-mail: [istvanne.magyarai@emmi.gov.hu](mailto:istvanne.magyarai@emmi.gov.hu)

## **Poland**

### **Central IEC**

Ethics Committee at Local Medical Chamber

Chair: Mariusz Janikowski MD

ul. Krupnicza 11A

31-123 Kraków

Phone: +48 12 619 17 12

Fax: +48 12 422 57 55

E-mail: [akrawczyk@hipokrates.org](mailto:akrawczyk@hipokrates.org)

## **Romania**

### **Central IEC**

Comisia Nationala de Etica pentru Studiul Clinic al Medicamentului

National Ethics Committee for the Drug Clinical Study  
Chair: Prof. Dr. Sava Dumitrescu  
011478 Bucharest  
str. Aviator Sanatescu, nr.48, sector 1  
Phone: +403 1405 1076  
Fax: +403 1405 1075

### **Spain**

Lead EC

CEIC Área 2 – Hospital Universitario de La Princesa  
Contact persons: Cecília López / Julio González  
C/ Diego de León, 627  
28006 Madrid  
Phone: +34 91 520 2476  
Fax: +34 91 520 2560  
E-mail: ceic.hlpr@salud.madrid.org

IDIAP Jordi Gol i Gurina  
Contact person: Mari Pau Moreno  
Av. Gran Via de les Corts Catalanes, 591 Àtic  
08007 Barcelona  
Phone: +34 93 482 4572  
Fax: ++34 93 482 4174  
E-mail: pmoreno@idiapjgol.org

CEIC Hospital General de Vic – Fundació FORES  
Contact person: Lidia Soler  
C/ Francesc Pla “El Vigatà”, 1  
08500 Vic  
Phone: +34 93 702 7713  
Fax: +34 93 885 0308  
E-mail: lsolerdelcoll@chv.cat

CEIC Hospital Mútua Terrassa  
Contact person: Susana Redondo  
Plaza Dr. Robert, 5  
08221 Terrassa  
Phone: +34 93 736 5050/Exit. 1032  
Fax: +34 93736 5059  
E-mail: ceichmt@mutuaterrassa.es

CEIC Capió Hospital General de Catalunya  
Contact person: Montse Granados  
C/ Pere i Pons, 1  
08195 Sant Cugat del Vallès  
Phone: +34 93565 6000/Exit. 5077  
Fax: +34 93589 2498  
E-mail: mgranado@hgc.es



**Slovakia**

Lead EC

Etická komisia JLF UK

Chair: Prof. MUDr. Gabriela Nosáľová, DrSc.

Sklabinská 26

03753 Martin

Phone: +421 434 132 535

Fax: +421 434 134 807

E-mail: [nasalova@jfmed.uniba.sk](mailto:nasalova@jfmed.uniba.sk)

Etická komisia GPN

Chair: MUDr. Viera Lesná.

Partizánska 27

81103 Bratislava

Phone: +421 254 640 091

Fax: +421 254 640 092

E-mail: [lesna@gpn.sk](mailto:lesna@gpn.sk)

Etická komisia Banskobystrického samosprávneho kraja

Chair: Mgr. Katarína Čupková

Námestie SNP 23<sub>9</sub>

97401 Banská Bystrica

Phone: +421 484 325 570

Fax: +421 484 325 515

E-mail: [zdenka.kadasiova@vucbb.sk](mailto:zdenka.kadasiova@vucbb.sk)

Etická komisia Bratislavského samosprávneho kraja

Chair: MUDr. Valerián Potičný

Sabinovská 16

82005 Bratislava 25

Phone: +421 248 264 823

Fax: +421 248 264 386

E-mail: [katarina.molnarova@region-bsk.sk](mailto:katarina.molnarova@region-bsk.sk)

Etická komisia Prešovského samosprávneho kraja

Chair: MUDr. Július Zbyňovský, MPH

Námestie mieru 2

08001 Prešov

Phone: +421 517 081 635

Fax: +421 517 481 638

E-mail: [lubica.cuperova@vucpo.sk](mailto:lubica.cuperova@vucpo.sk)

Subject Information Sheet and Informed Consent Form:

Final English Version 1.0, 14-DEC-2011<sub>10</sub>
